# Supplementary material for: Predictors of pulmonary sequelae after COVID-19 pneumonia: A 12-month follow-up study
Source: PubMed Central journal article supplement (PMC9932038; doi:10.3389/fmed.2023.1084002), 2023-02-02
Supplement: Data_Sheet_1.pdf [file Data_Sheet_1.pdf]

## *Supplementary Material*

### **Predictors of pulmonary sequelae after COVID-19 pneumonia: a 12-month follow-up study.**

**N. Bernardinello<sup>1†</sup>, E. Cocconcelli<sup>1†</sup>, C. Giraud<sup>2</sup>, M. Daverio<sup>1</sup>, G. Castelli<sup>1</sup>, S. Petrarulo<sup>1</sup>, M. Bovo<sup>3</sup>, G. Fichera<sup>4</sup>, S. Cavinato<sup>5</sup>; A. M. Cattelan<sup>5</sup>, M. Saetta<sup>1</sup>, P. Spagnolo<sup>1</sup>, E. Balestro<sup>1</sup>**

**1. Respiratory Disease Unit, Department of Cardiac, Thoracic, Vascular Sciences, and Public Health, University of Padova and Padova City Hospital, Padova, Italy**

**2. Department of Medicine, Institute of Radiology, University of Padova and Padova City Hospital, Padova, Italy**

**3. University of Padova, School of Medicine**

**4. Pediatric Radiology Unit, University Hospital of Padova, Padova, Italy**

**5. Division of Infectious and Tropical Diseases, University of Padova and Padova City Hospital, Padova, Italy**

† These authors share the first authorship

\*Corresponding author: Dr. Elisabetta Balestro (MD, Ph.D.)

Tel: +39 049 8213702; fax: +39 049 8213110.

Email: [elisabetta.balestro@aopd.veneto.it](mailto:elisabetta.balestro@aopd.veneto.it)

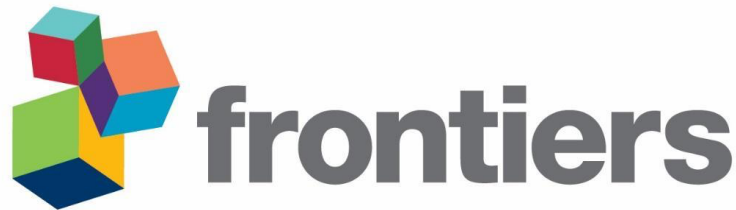

**Table S1: treatment during hospitalization of patients who assisted at follow-up in the post-COVID clinic according to CT scan recovery at 12 months (n=347)**

|                                            | Overall population<br>(n=347) | REC<br>(n=323)  | NOT-REC<br>(n=24) | <i>P</i>     |
|--------------------------------------------|-------------------------------|-----------------|-------------------|--------------|
| Hydroxychloroquine/chloroquine – n (%)     | 132 (38)                      | 121 (38)        | 11 (46)           | 0.51         |
| Azithromycin – n (%)                       | 209 (60)                      | 196 (61)        | 13 (54)           | 0.52         |
| Ceftriaxone – n (%)                        | 142 (41)                      | 132 (41)        | 10 (42)           | 0.99         |
| Other antibiotics – n (%)                  | 116 (33)                      | 101 (31)        | 15 (62)           | <b>0.003</b> |
| Lopinavir/ritonavir – n (%)                | 65 (19)                       | 58 (18)         | 7 (29)            | 0.18         |
| Remdesivir – n (%)                         | 107 (31)                      | 98 (30)         | 9 (37)            | 0.50         |
| Other antivirals – n (%)                   | 6 (2)                         | 5 (2)           | 1 (4)             | 0.35         |
| Tocilizumab – n (%)                        | 18 (5)                        | 15 (5)          | 3 (12)            | 0.12         |
| Corticosteroids – n (%)                    | 238 (69)                      | 217 (67)        | 21 (87)           | <b>0.04</b>  |
| Heparins – n (%)                           | 281 (81)                      | 262 (81)        | 19 (79)           | 0.79         |
| IgG plasma – n (%)                         | 67 (19)                       | 62 (19)         | 5 (21)            | 0.79         |
| <b>Corticosteroids at discharge– n (%)</b> | <b>195 (56)</b>               | <b>179 (55)</b> | <b>16 (70)</b>    | <b>0.20</b>  |

Values are expressed as numbers and (%). To compare treatment during hospitalization between recovered (REC) and not recovered (NOT-REC), a chi-square test or a Fisher's t-test ( $n < 5$ ) for categorical variables was used.
